# Supplementary material for: Anti-Fibrotic Potential of Tomentosenol A, a Constituent of Cerumen from the Australian Native Stingless Bee, Tetragonula carbonaria
Source: MDPI journal article supplement (doi:10.3390/antiox11081604), 2022-08-19

**Anti-fibrotic Potential of Tomentosenol A, a Constituent of Cerumen from the Australian  
Stingless Bee *Tetragonula carbonaria***

**Supporting Information**

**Table S1.** NMR Data ( $^1\text{H}$  600 MHz,  $^{13}\text{C}$  150 MHz) for **1**

**Table S2.** NMR Data ( $^1\text{H}$  600 MHz,  $^{13}\text{C}$  150 MHz) for **2**

**Figure S1.**  $^1\text{H}$  Spectrum of **1** in  $\text{CDCl}_3$

**Figure S2.**  $^{13}\text{C}$  Spectrum of **1** in  $\text{CDCl}_3$

**Figure S3.** HSQC Spectrum of **1** in  $\text{CDCl}_3$

**Figure S4.** COSY Spectrum of **1** in  $\text{CDCl}_3$

**Figure S5.** HMBC Spectrum of **1** in  $\text{CDCl}_3$

**Figure S6.**  $^1\text{H}$  Spectrum of **1** in  $\text{MeOH-}d_4$

**Figure S7.**  $^{13}\text{C}$  Spectrum of **1** in  $\text{MeOH-}d_4$

**Figure S8.** HSQC Spectrum of **1** in  $\text{MeOH-}d_4$

**Figure S9.** COSY Spectrum of **1** in  $\text{MeOH-}d_4$

**Figure S10.** HSQC-TOCSY Spectrum of **1** in  $\text{MeOH-}d_4$

**Figure S11.** HMBC Spectrum of **1** in  $\text{MeOH-}d_4$

**Figure S12.**  $^1\text{H}$  Spectrum of **2** in  $\text{DMSO-}d_6$

**Figure S13.**  $^{13}\text{C}$  Spectrum of **2** in  $\text{DMSO-}d_6$

**Figure S14.** HSQC Spectrum of **2** in  $\text{DMSO-}d_6$

**Figure S15.** COSY Spectrum of **2** in  $\text{DMSO-}d_6$

**Figure S16.** HMBC Spectrum of **2** in  $\text{DMSO-}d_6$

**Figure S17.** 1D ROESY Spectrum of **2** in  $\text{DMSO-}d_6$  (irradiated at 5.70 ppm)

**Figure S18.** 1D ROESY Spectrum of **2** in  $\text{DMSO-}d_6$  (irradiated at 5.10 ppm)

**Figure S19.** 1D ROESY Spectrum of **2** in  $\text{DMSO-}d_6$  (irradiated at 2.17 ppm)

**Figure S20.**  $^1\text{H}$  Spectrum of **2** in  $\text{CDCl}_3$

**Figure S21.** Cell viability assessed using the MTT assay after 24h incubation of NFFs with 0.75-25  $\mu\text{M}$  of **2** (A, n=8). NFF proliferation during 72 h treatment with **2** (B; **2**, n=2; DMSO, n=3). Data are mean $\pm$ SEM.

**Figure S22.** Effects of **2** (n=2) or DMSO (n=3) on wound repopulation by NFFs incubated for 72 h (n=2). Data was analysed for wound width (A) and rate of cell migration into the wound region (B).

**Table S1.** NMR Data ( $^1\text{H}$  600 MHz,  $^{13}\text{C}$  150 MHz) for **1**

| Pos.  | Tomentosenol A <sup>a,b</sup> |                        | 1A <sup>b</sup>       |                     | 1B <sup>b</sup>       |                     | 1A <sup>c</sup>       |                          |
|-------|-------------------------------|------------------------|-----------------------|---------------------|-----------------------|---------------------|-----------------------|--------------------------|
|       | $\delta_{\text{C}}$           | $\delta_{\text{H}}$    | $\delta_{\text{C}}$   | $\delta_{\text{H}}$ | $\delta_{\text{C}}$   | $\delta_{\text{H}}$ | $\delta_{\text{C}}$   | $\delta_{\text{H}}$      |
| 2(2') | 146.3, C                      |                        | 146.4, C              |                     | 147.5, C              |                     | 149.3, C              |                          |
| 3     | 41.2, CH <sub>2</sub>         | 2.49, m                | 41.4, CH <sub>2</sub> | 2.47, m             | 39.1, CH <sub>2</sub> | 2.33 <sup>e</sup>   | 42.2, CH <sub>2</sub> | 2.59, dd<br>(10.8, 13.2) |
|       |                               | 2.06, m                |                       | 2.09, m             |                       | 2.12 <sup>e</sup>   |                       | 1.96, m                  |
| 4     | 31.1, CH                      | 3.02, brs              | 31.4, CH              | 3.00, brs           | 31.3, CH              | 2.48 <sup>e</sup>   | 31.9, CH              | 3.28, m                  |
| 4a    | 114.3, C                      |                        | 114.4, C              |                     | 61.1, CH              | 3.74, d<br>(2.4)    | 115.9, CH             |                          |
| 5     | 198.0, C                      |                        | 198.0, C              |                     | 205.4, C              |                     | <sup>d</sup>          |                          |
| 6     | 55.7, C                       |                        | 55.9, C               |                     | 59.0, C               |                     | 53.2, C               |                          |
| 7     | 212.9, C                      |                        | 213.0, C              |                     | 210.7, C              |                     | 215.1, C              |                          |
| 8     | 47.7, C                       |                        | 47.9, C               |                     | 59.1, C               |                     | 51.4, C               |                          |
| 8a    | 170.1, C                      |                        | 170.2, C              |                     | 205.7, C              |                     | <sup>d</sup>          |                          |
| 9     | 25.2, CH <sub>3</sub>         | 1.46, s                | 25.1, CH <sub>3</sub> | 1.42, s             | 22.6, CH <sub>3</sub> | 1.33, s             | 25.8, CH <sub>3</sub> | 1.33, s                  |
| 10    | 24.9, CH <sub>3</sub>         | 1.43, s                | 26.5, CH <sub>3</sub> | 1.41, s             | 23.2, CH <sub>3</sub> | 1.29, s             | 24.6, CH <sub>3</sub> | 1.32, s                  |
| 11    | 25.6, CH <sub>3</sub>         | 1.33, s                | 23.7, CH <sub>3</sub> | 1.30, s             | 21.8, CH <sub>3</sub> | 1.33, s             | 25.8, CH <sub>3</sub> | 1.33, s                  |
| 12    | 23.6, CH <sub>3</sub>         | 1.32, s                | 25.7, CH <sub>3</sub> | 1.32, s             | 23.5, CH <sub>3</sub> | 1.27, s             | 24.6, CH <sub>3</sub> | 1.32, s                  |
| 1'    | 45.3, CH                      | 2.08, m                | 45.4, CH              | 2.08, m             | 45.2, CH              | 2.05, m             | 42.1, CH              | 2.00, m                  |
| 3'    | 118.3, CH                     | 5.12, s                | 118.4, CH             | 5.10, s             | 119.2, CH             | 5.16, s             | 117.9, CH             | 5.03, s                  |
| 4'    | 31.3, CH <sub>2</sub>         | 2.13, m                | 31.5, CH <sub>2</sub> | 2.17, m             | 29.8, CH <sub>2</sub> | 1.25, m             | 32.3, CH <sub>2</sub> | 2.13, t (2.4)            |
| 5'    | 40.7, CH                      | 2.04, m                | 40.9, CH              | 2.03, m             | 40.9, CH              | 2.03, m             | 42.1, CH              | 2.00, m                  |
| 6'    | 38.2, C                       |                        | 38.3, C               |                     | 38.3, C               |                     | 38.9, C               |                          |
| 7'    | 31.8, CH <sub>2</sub>         | 2.33, dt<br>(5.6, 8.5) | 31.9, CH <sub>2</sub> | 2.33 <sup>e</sup>   | 32.2, CH <sub>2</sub> | 2.35 <sup>e</sup>   | 32.9, CH <sub>2</sub> | 2.31, dt<br>(5.4, 8.4)   |
|       |                               | 0.93, d<br>(8.5)       |                       | 0.92 <sup>e</sup>   |                       | 0.85 <sup>e</sup>   |                       | 0.97, d (8.4)            |
| 8'    | 21.0, CH <sub>3</sub>         | 1.26, s                | 21.2, CH <sub>3</sub> | 0.81, s             | 21.2, CH <sub>3</sub> | 0.82, s             | 21.5, CH <sub>3</sub> | 0.83, s                  |
| 9'    | 26.3, CH <sub>3</sub>         | 0.83, s                | 26.5, CH <sub>3</sub> | 1.25, s             | 26.4, CH <sub>3</sub> | 1.26, s             | 26.9, CH <sub>3</sub> | 1.27, s                  |
| 1''   | 42.9, CH <sub>2</sub>         | 1.69, m                | 43.1, CH <sub>2</sub> | 1.68, m             | 40.0, CH <sub>2</sub> | 1.61 <sup>e</sup>   | 43.9, CH <sub>2</sub> | 1.82, m                  |
|       |                               | 1.41 <sup>e</sup>      |                       | 1.41 <sup>e</sup>   |                       | 1.00, m             |                       | 1.23, m                  |
| 2''   | 26.5, CH                      | 1.41 <sup>e</sup>      | 26.7, CH              | 1.42 <sup>e</sup>   | 25.9, CH              | 1.63, m             | 27.8, CH              | 1.38, m                  |
| 3''   | 23.4, CH <sub>3</sub>         | 0.89, d<br>(6.0)       | 23.6, CH <sub>3</sub> | 0.87, d<br>(5.4)    | 21.6, CH <sub>3</sub> | 0.93, d<br>(6.6)    | 24.2, CH <sub>3</sub> | 0.84, d (6.6)            |
| 4''   | 22.3, CH <sub>3</sub>         | 0.87, d<br>(6.0)       | 22.4, CH <sub>3</sub> | 0.85, d<br>(5.4)    | 23.9, CH <sub>3</sub> | 0.88, d<br>(6.0)    | 22.9, CH <sub>3</sub> | 0.86, d (6.6)            |
| 8a-OH |                               | 5.72, s                |                       | 5.65, brs           |                       |                     |                       |                          |

<sup>a</sup> Referenced Liu, H.-X.; Zhang, W.-M.; Xu, Z.-F.; Chen, Y.-C.; Tan, H.-B.; Qiu, S.-X., *RSC Adv.* **2016**, 6, 25882-25886

<sup>b</sup> Recorded in CDCl<sub>3</sub>

<sup>c</sup> Recorded in CD<sub>3</sub>OD

<sup>d</sup> Not observed

<sup>e</sup> Overlapped signals

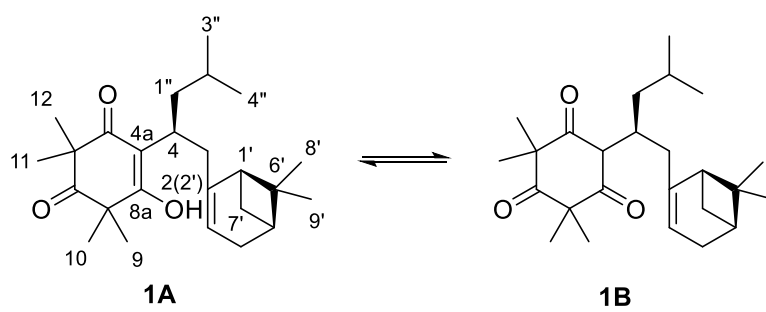

**Table S2.** NMR Data (<sup>1</sup>H 600 MHz, <sup>13</sup>C 150 MHz) for **2**

| Pos.    | Torellianone A<br><i>a,b</i>                         | Torellianone B<br><i>a,b</i>                   | <b>2</b> <sup>b</sup>                          | <b>2</b> <sup>c</sup>                   |                       |              |                                 |
|---------|------------------------------------------------------|------------------------------------------------|------------------------------------------------|-----------------------------------------|-----------------------|--------------|---------------------------------|
|         | δ <sub>H</sub>                                       | δ <sub>H</sub>                                 | δ <sub>H</sub>                                 | δ <sub>H</sub>                          | δ <sub>C</sub>        | ROESY        | HMBC                            |
| 1a      |                                                      |                                                |                                                |                                         | 165.2, C              |              |                                 |
| 2       |                                                      |                                                |                                                |                                         | 46.8, C               |              |                                 |
| 3       |                                                      |                                                |                                                |                                         | 210.7, C              |              |                                 |
| 4       |                                                      |                                                |                                                |                                         | 55.7, C               |              |                                 |
| 5       |                                                      |                                                |                                                |                                         | 196.1, C              |              |                                 |
| 5a      |                                                      |                                                |                                                |                                         | 111.9, C              |              |                                 |
| 6       | 5.283, s                                             | 5.275, s                                       | 5.280, s                                       | 5.10, s                                 | 32.3, CH              | 16-OH, 2'/6' | 5, 1a, 8, 16, 1', 2', 6', 5a, 7 |
| 7       |                                                      |                                                |                                                |                                         | 105.3, C              |              |                                 |
| 8       |                                                      |                                                |                                                |                                         | 154.0, C              |              |                                 |
| 9       |                                                      |                                                |                                                |                                         | 103.6, C              |              |                                 |
| 10      |                                                      |                                                |                                                |                                         | 157.9, C              |              |                                 |
| 12      | 5.411, dd (3.1, 12.7)                                | 5.406, dd (13.2, 2.9)                          | 5.411, dd (3.0, 12.6)                          | 5.70, d (12.0)                          | 78.3, CH              | 13b          | 14, 2'', 6'', 1'', 13           |
| 13      | α: 3.05, dd (12.7, 17.2)<br>β: 2.857, dd (3.1, 17.2) | 3.02, dd (13.2, 17.2)<br>2.847, dd (17.2, 2.9) | 3.05, dd (13.2, 16.8)<br>2.856, dd (2.4, 17.4) | 3.30, dd (12.0, 16.8)<br>2.93, d (17.4) | 41.9, CH <sub>2</sub> | 2''/6''      | 14, 12, 1''<br>14, 15, 1''      |
| 14      |                                                      |                                                |                                                |                                         | 198.0, C              |              |                                 |
| 15      |                                                      |                                                |                                                |                                         | 104.9, C              |              |                                 |
| 16      |                                                      |                                                |                                                |                                         | 157.2, C              |              |                                 |
| 17      | 2.22, s                                              | 2.22, s                                        | 2.22, s                                        | 2.17, s                                 | 7.5, CH <sub>3</sub>  | 12, 2''/6''  | 8, 9, 10                        |
| 18      | 1.13, s                                              | 1.13, s                                        | 1.13, s                                        | 1.04, s                                 | 24.3, CH <sub>3</sub> |              | 3, 4, 5, 19                     |
| 19      | 1.34, s                                              | 1.34, s                                        | 1.34, s                                        | 1.24, s                                 | 22.8, CH <sub>3</sub> |              | 3, 4, 5, 18                     |
| 20      | 1.546, s                                             | 1.55, s                                        | 1.547, s                                       | 1.49, s                                 | 24.4, CH <sub>3</sub> |              | 1a, 2, 3, 21                    |
| 21      | 1.65, s                                              | 1.65, s                                        | 1.65, s                                        | 1.60, s                                 | 24.9, CH <sub>3</sub> |              | 1a, 2, 3, 20                    |
| 1'      |                                                      |                                                |                                                |                                         | 143.7, C              |              |                                 |
| 2'/6'   | 7.31, dd (1.6, 7.3)                                  | 7.30, dd (J = 1.6, 7.3)                        | 7.31, d (7.2)                                  | 7.23, m                                 | 127.7, CH x 2         | 6            | 6, 4'                           |
| 3'/5'   | 7.24, t (7.3)                                        | 7.22, t (J = 7.3)                              | 7.24, t (7.8)                                  | 7.25, m                                 | 128.2, CH x 2         |              | 1'                              |
| 4'      | 7.15, tt (1.2, 7.3)                                  | 7.14, tt (J = 1.2, 7.3)                        | 7.15, t (7.2)                                  | 7.14, t (7.2)                           | 126.4, CH             |              | 1', 2', 6'                      |
| 1''     |                                                      |                                                |                                                |                                         | 138.5, C              |              |                                 |
| 2''/6'' | 7.45, m                                              | 7.45, m                                        | 7.45, m                                        | 7.52, d (7.2)                           | 126.4, CH x 2         |              | 12, 4''                         |
| 3''/5'' | 7.45, m                                              | 7.45, m                                        | 7.45, m                                        | 7.45, t (7.2)                           | 128.7, CH x 2         |              | 1'', 2'', 6''                   |
| 4''     | 7.41, m                                              | 7.41, m                                        | 7.41, m                                        | 7.40, t (7.2)                           | 128.6, CH             |              | 2'', 6''                        |
| 16-OH   | 12.08, s                                             | 12.07, s                                       | 12.09, s                                       | 12.30, s                                |                       | 6            | 7, 15, 16, 14 <sub>w</sub>      |

<sup>a</sup> Referenced Senadeera, S. P.; Lucantoni, L.; Duffy, S.; Avery, V. M.; Carroll, A. R., *J. Nat. Prod.* **2018**, 81, 1588-1597

<sup>b</sup> Recorded in CDCl<sub>3</sub>

<sup>c</sup> Recorded in DMSO-*d*<sub>6</sub>

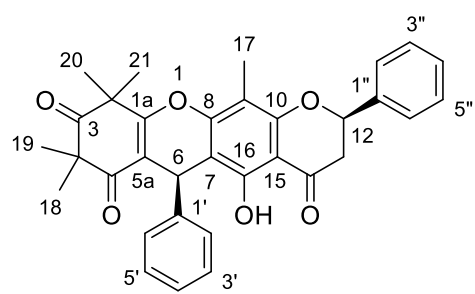

**2**

**Figure S1.**  $^1\text{H}$  Spectrum of **1** in  $\text{CDCl}_3$

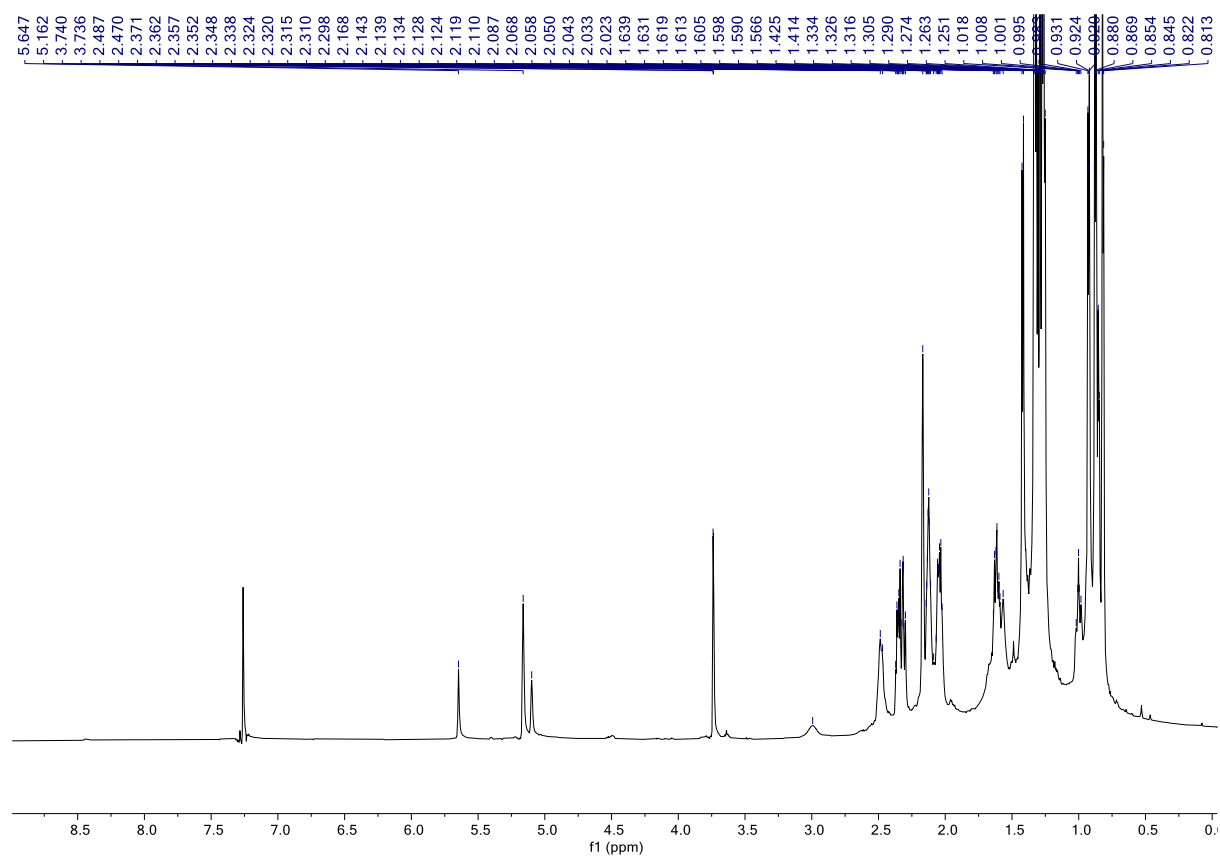

**Figure S2.**  $^{13}\text{C}$  Spectrum of **1** in  $\text{CDCl}_3$

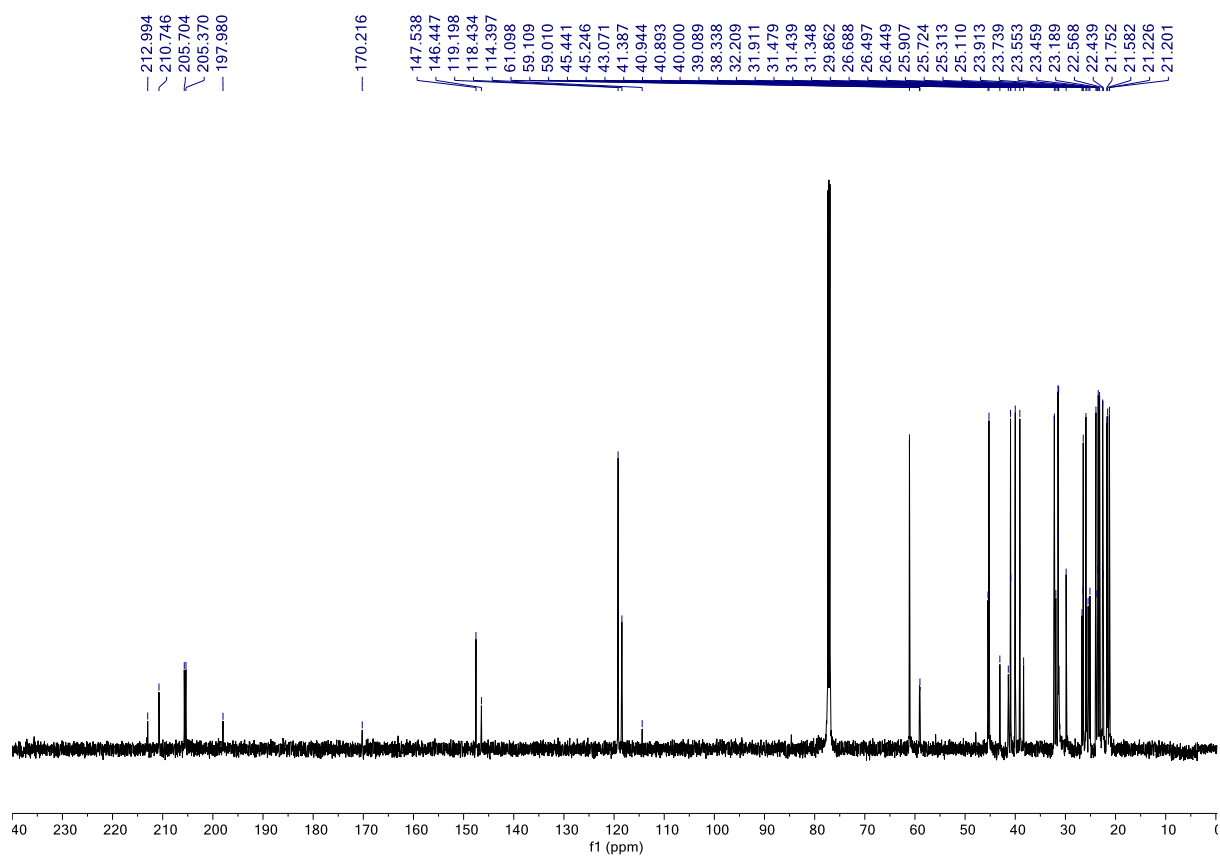

**Figure S3.** HSQC Spectrum of **1** in CDCl<sub>3</sub>

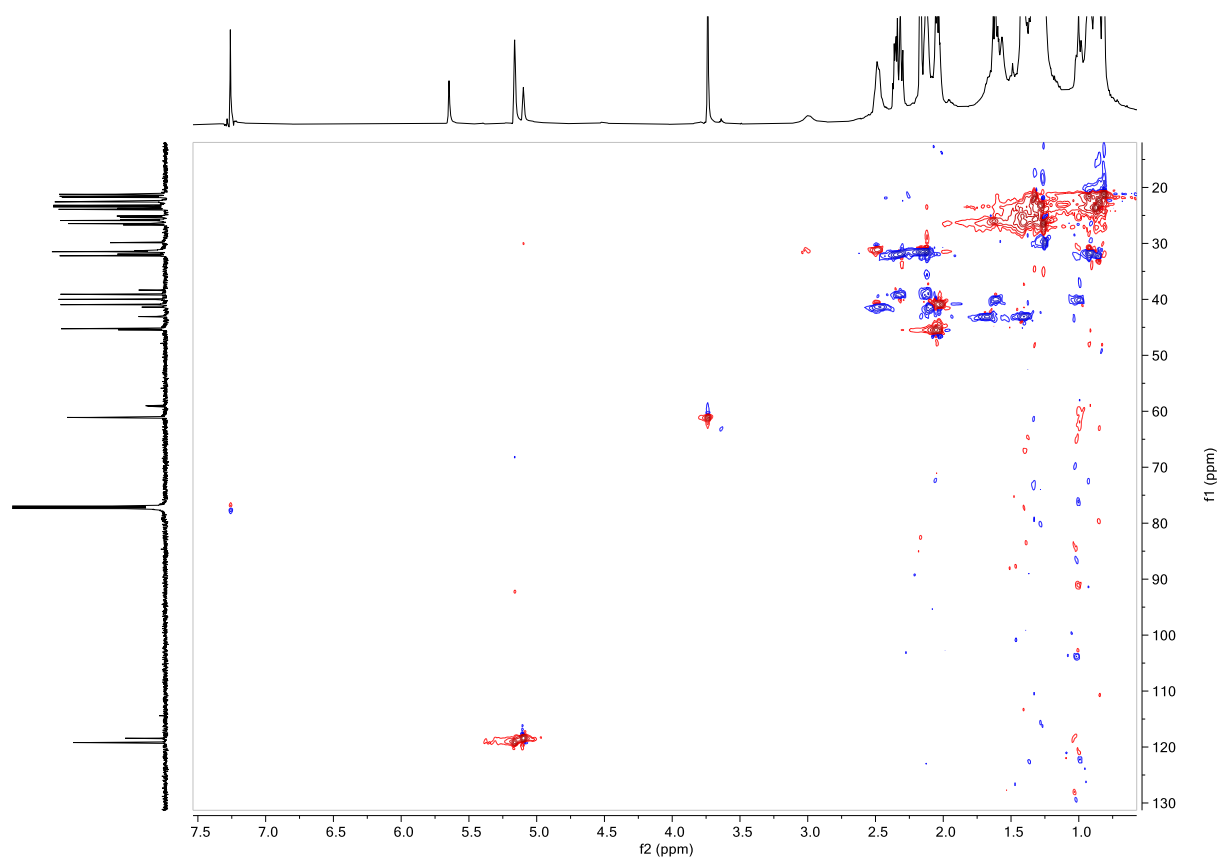

**Figure S4.** COSY Spectrum of **1** in CDCl<sub>3</sub>

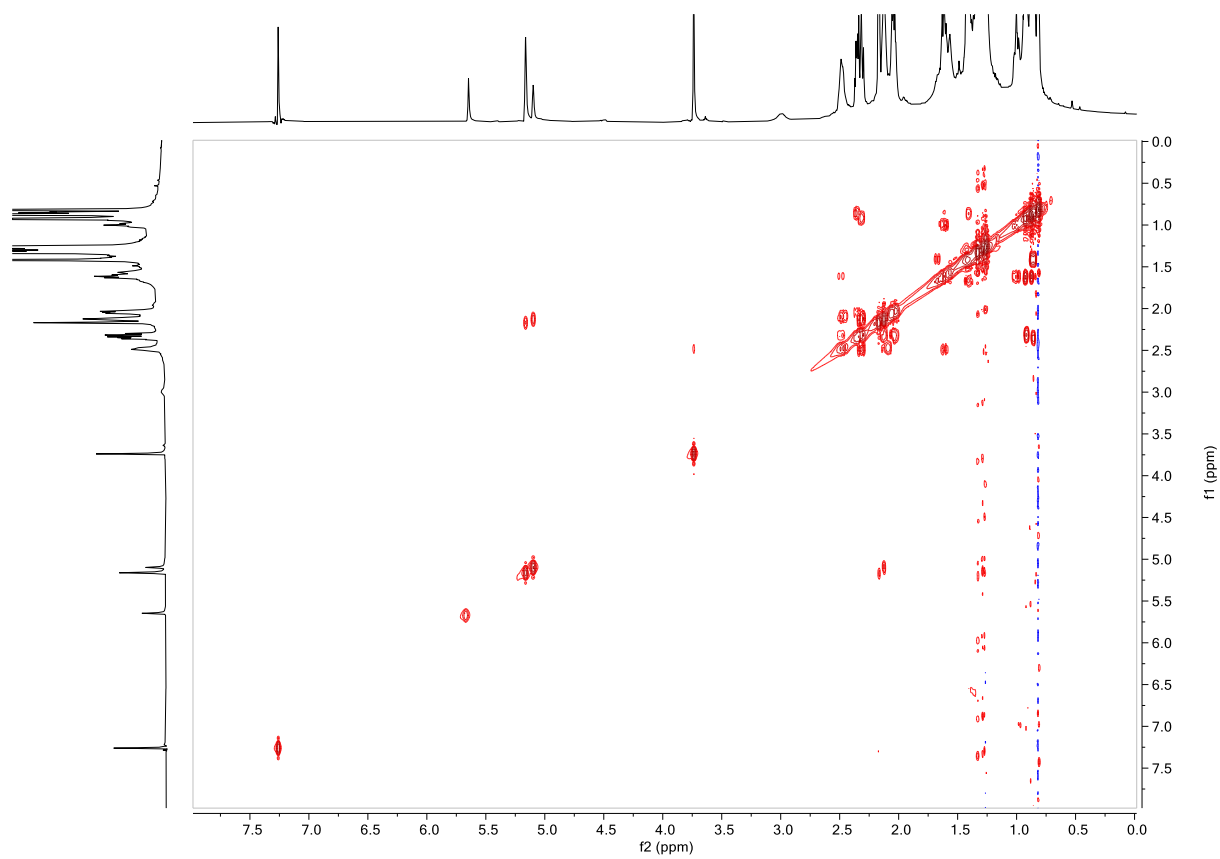



**Figure S5.** HMBC Spectrum of **1** in CDCl<sub>3</sub>

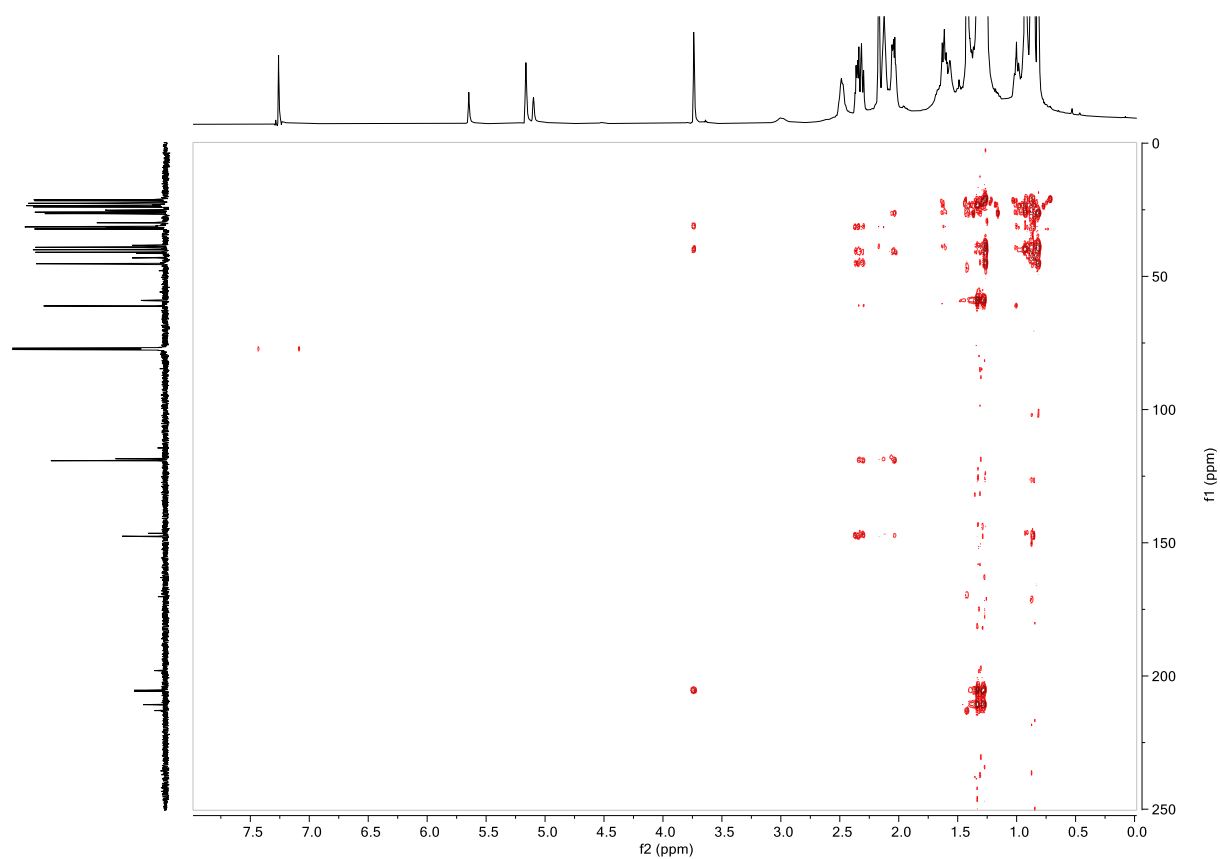

**Figure S6.** <sup>1</sup>H Spectrum of **1** in MeOH-*d*<sub>4</sub>

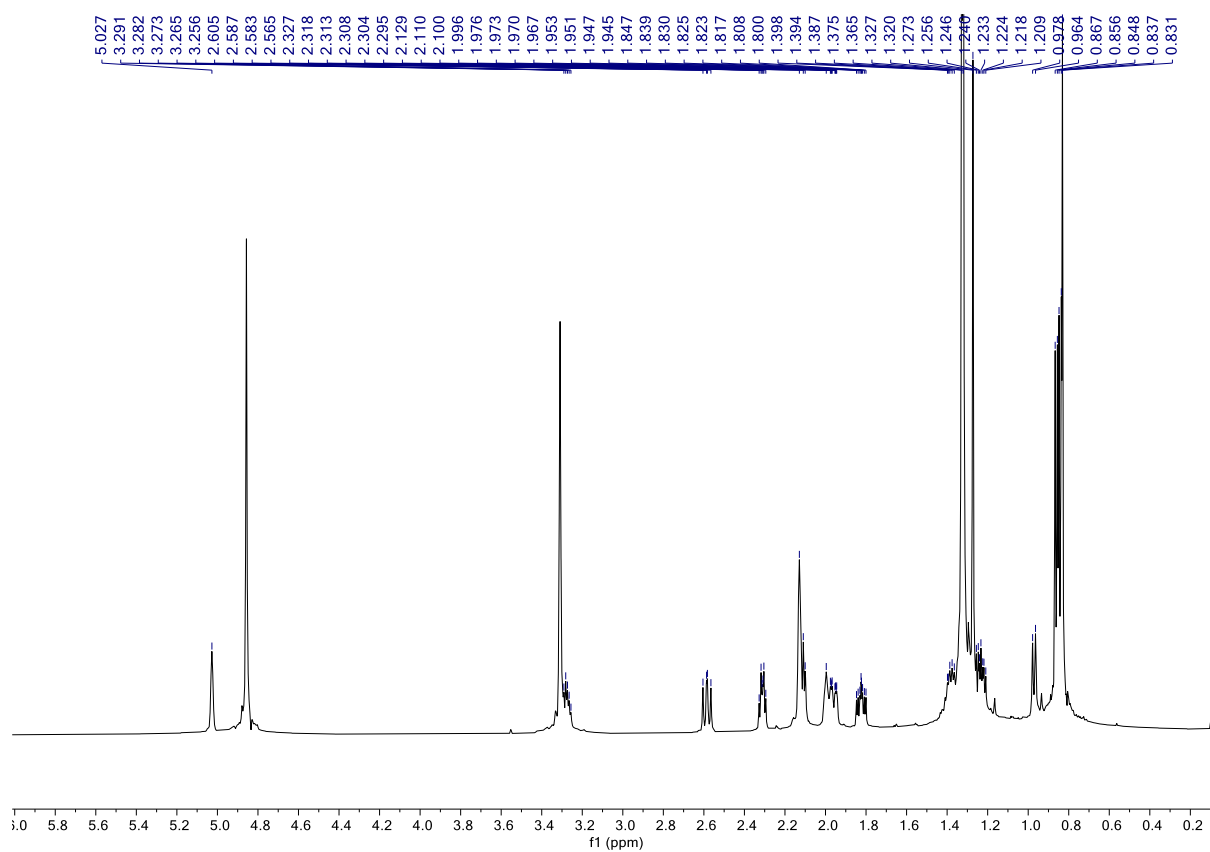

**Figure S7.**  $^{13}\text{C}$  Spectrum of **1** in  $\text{MeOH-}d_4$

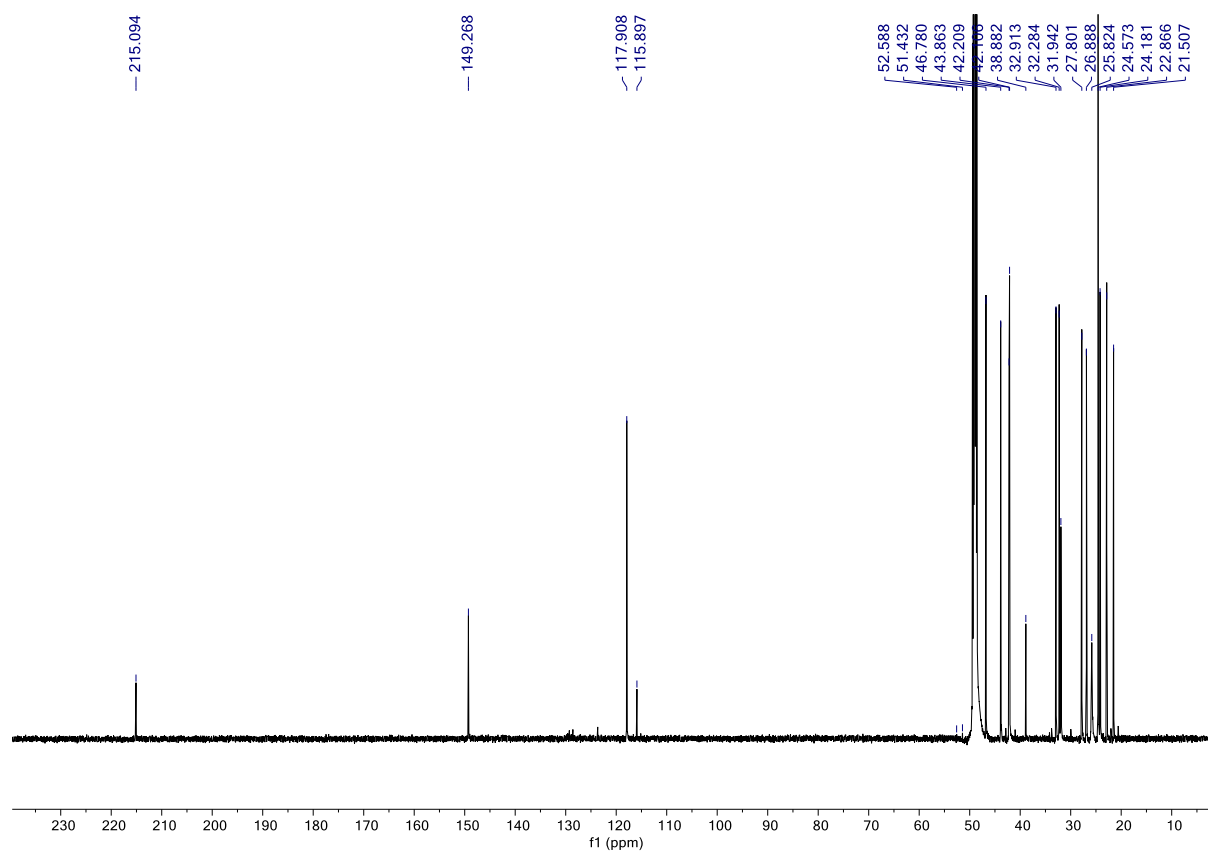

**Figure S8.** HSQC Spectrum of **1** in  $\text{MeOH-}d_4$

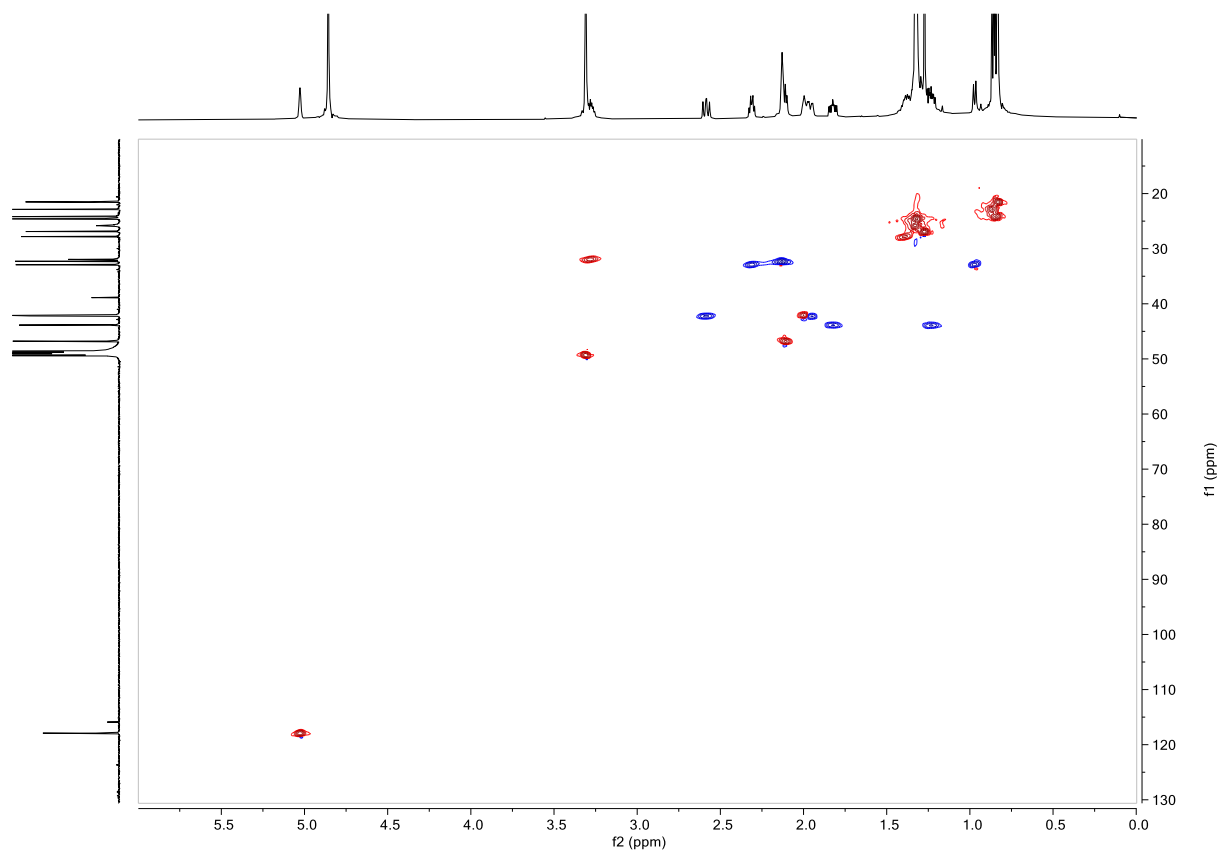

**Figure S9.** COSY Spectrum of **1** in MeOH- $d_4$

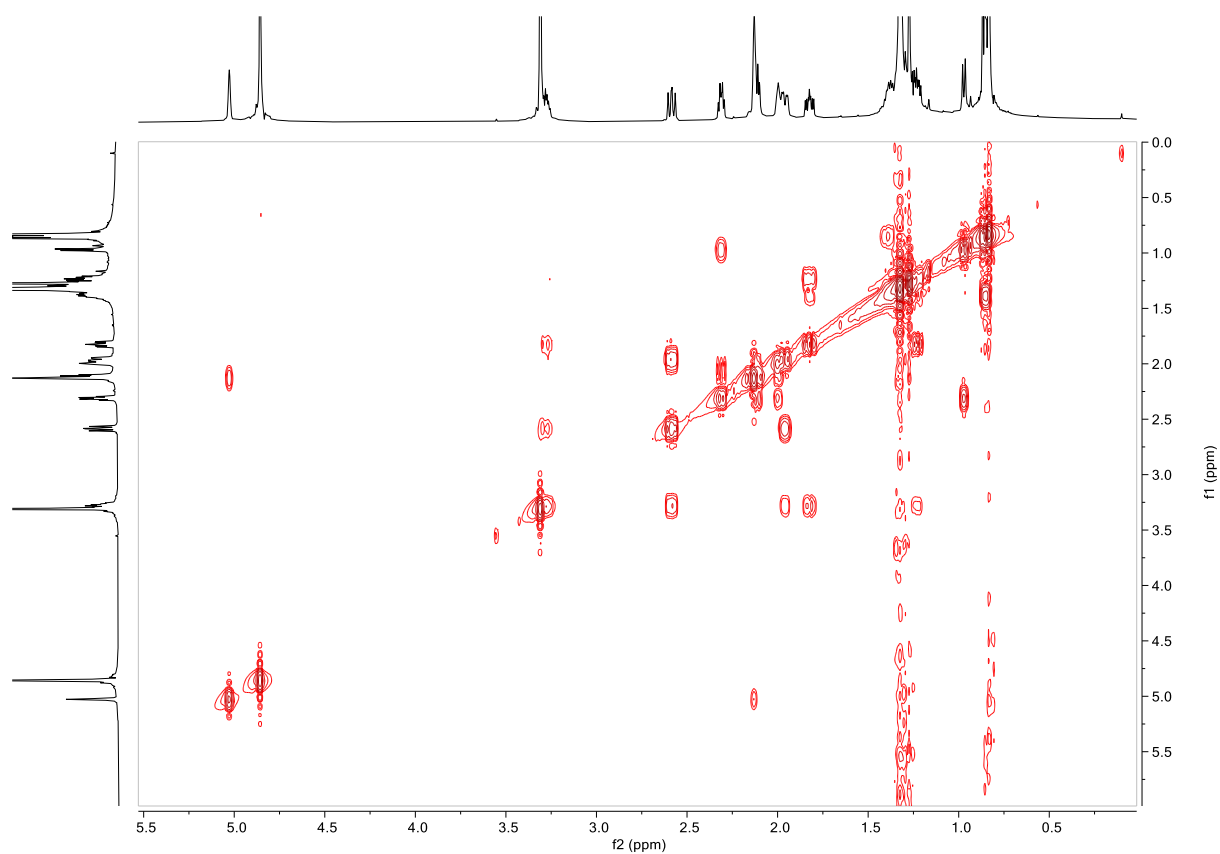

**Figure S10.** HSQC\_TOCSY Spectrum of **1** in MeOH- $d_4$

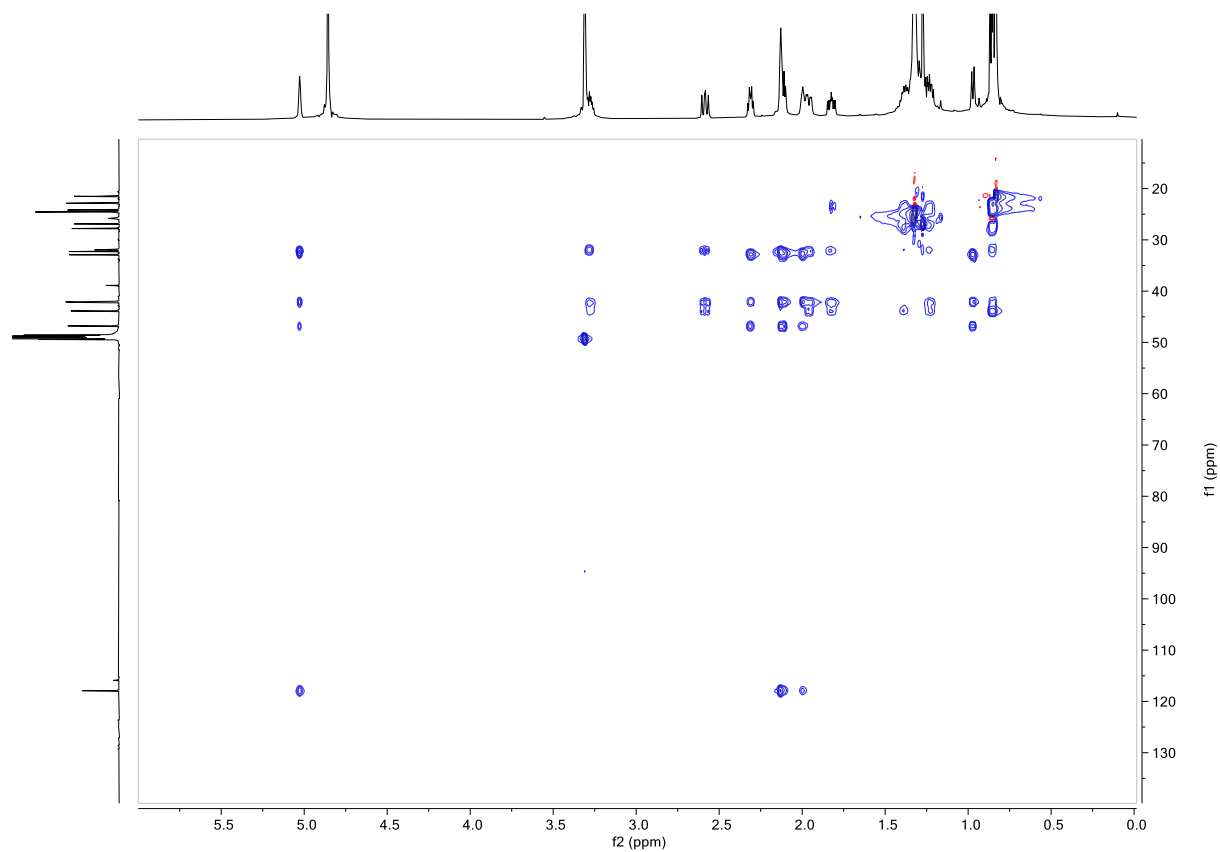

**Figure S11.** HMBC Spectrum of **1** in MeOH- $d_4$

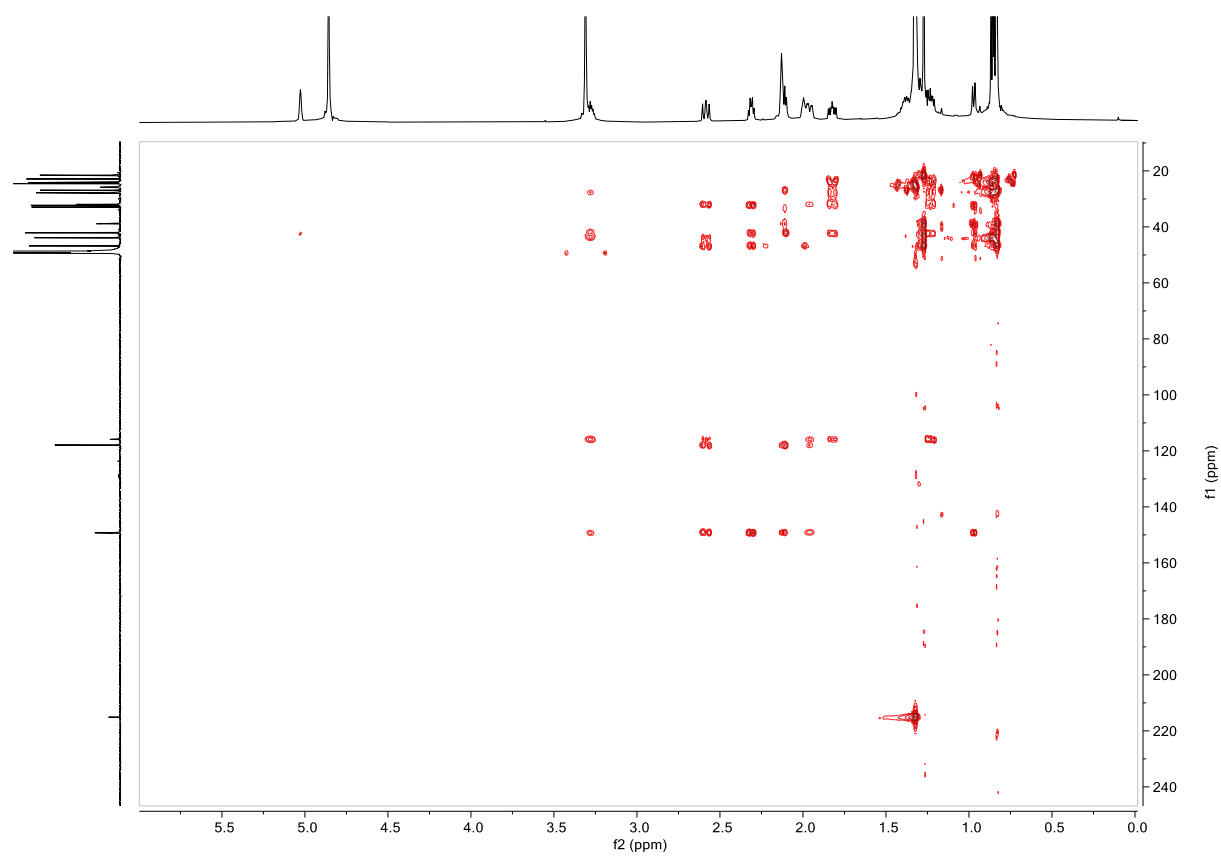

**Figure S12.**  $^1\text{H}$  Spectrum of **2** in  $\text{DMSO-}d_6$

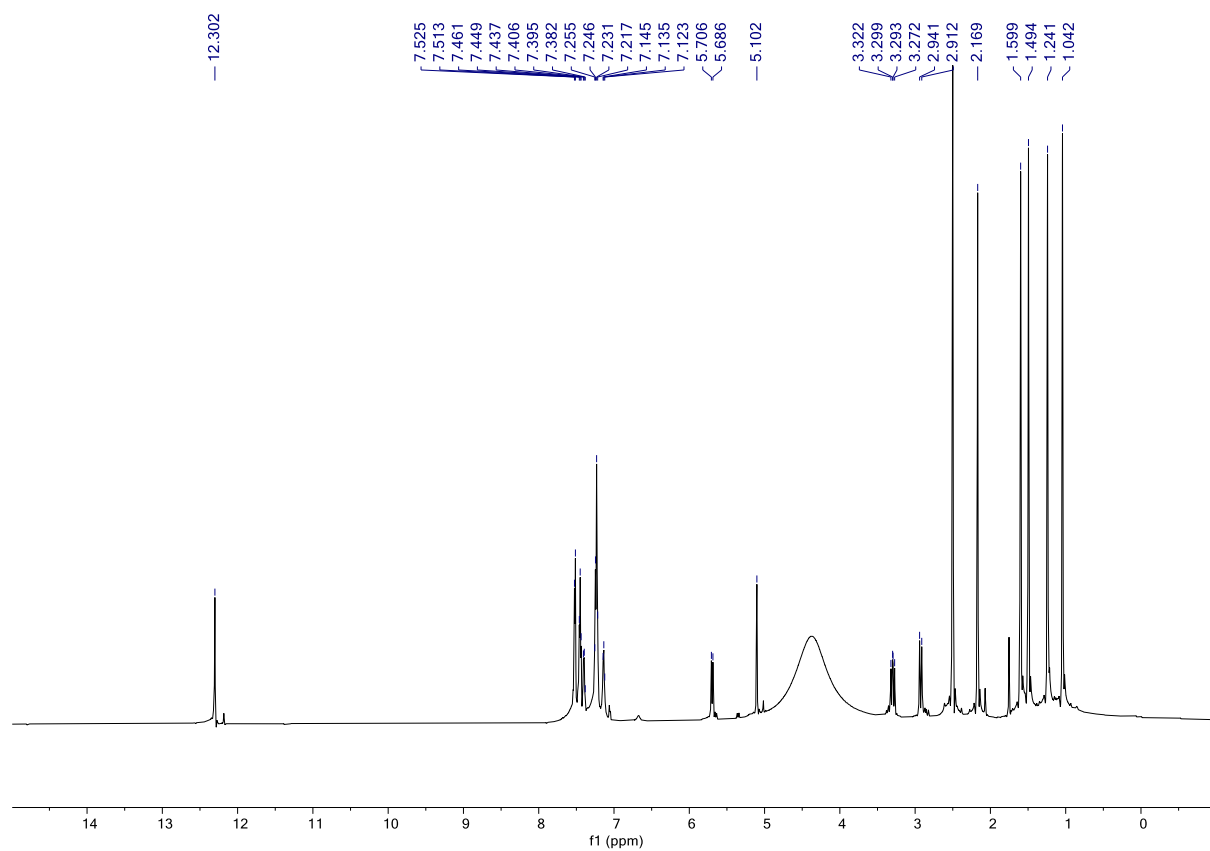

**Figure S13.**  $^{13}\text{C}$  Spectrum of **2** in  $\text{DMSO-}d_6$

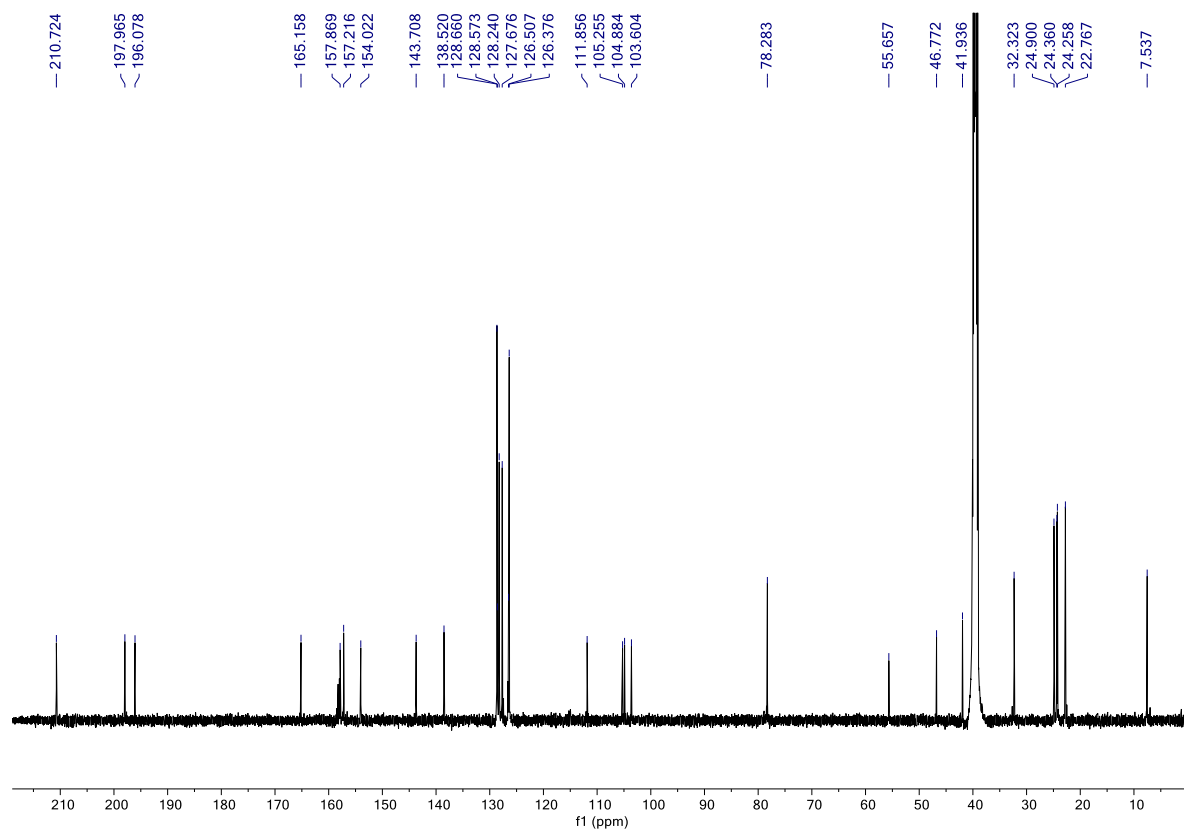

**Figure S14.** HSQC Spectrum of **2** in DMSO-*d*<sub>6</sub>

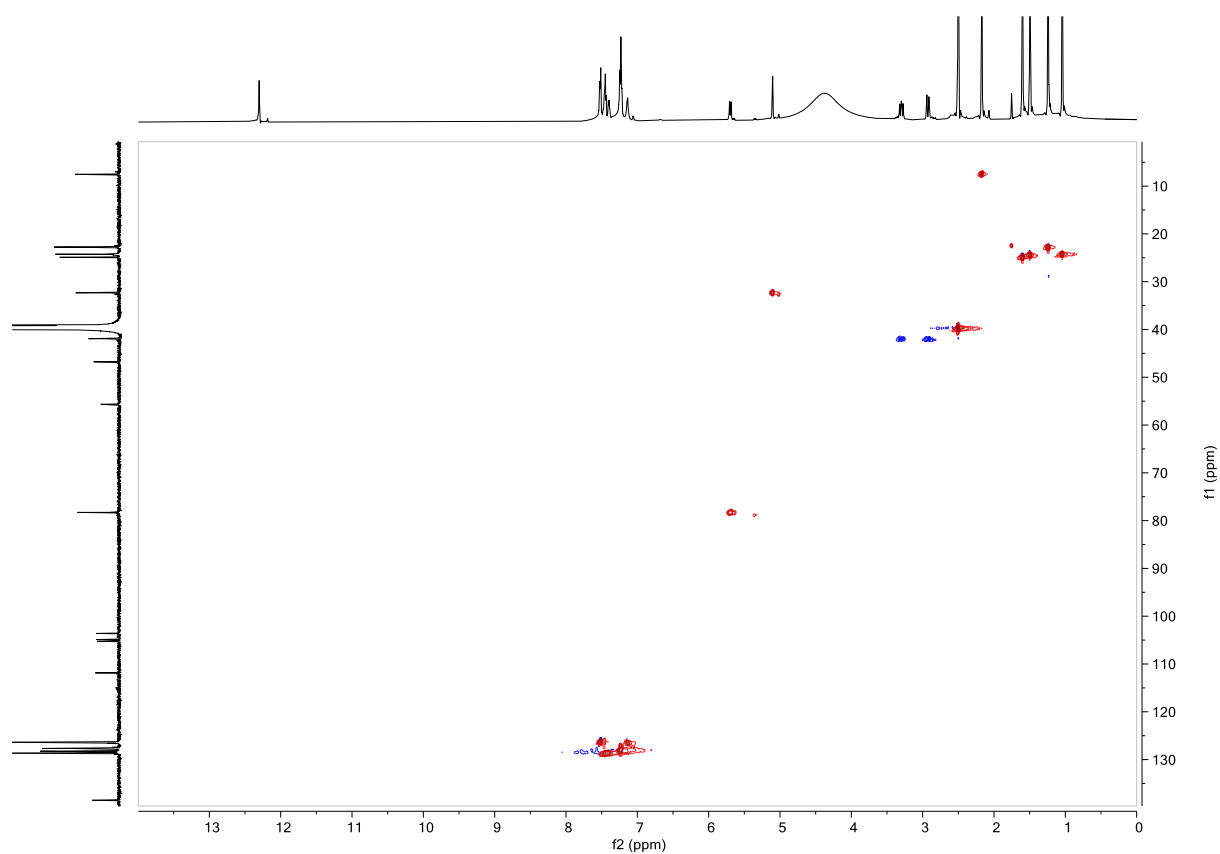

**Figure S15.** COSY Spectrum of **2** in DMSO-*d*<sub>6</sub>

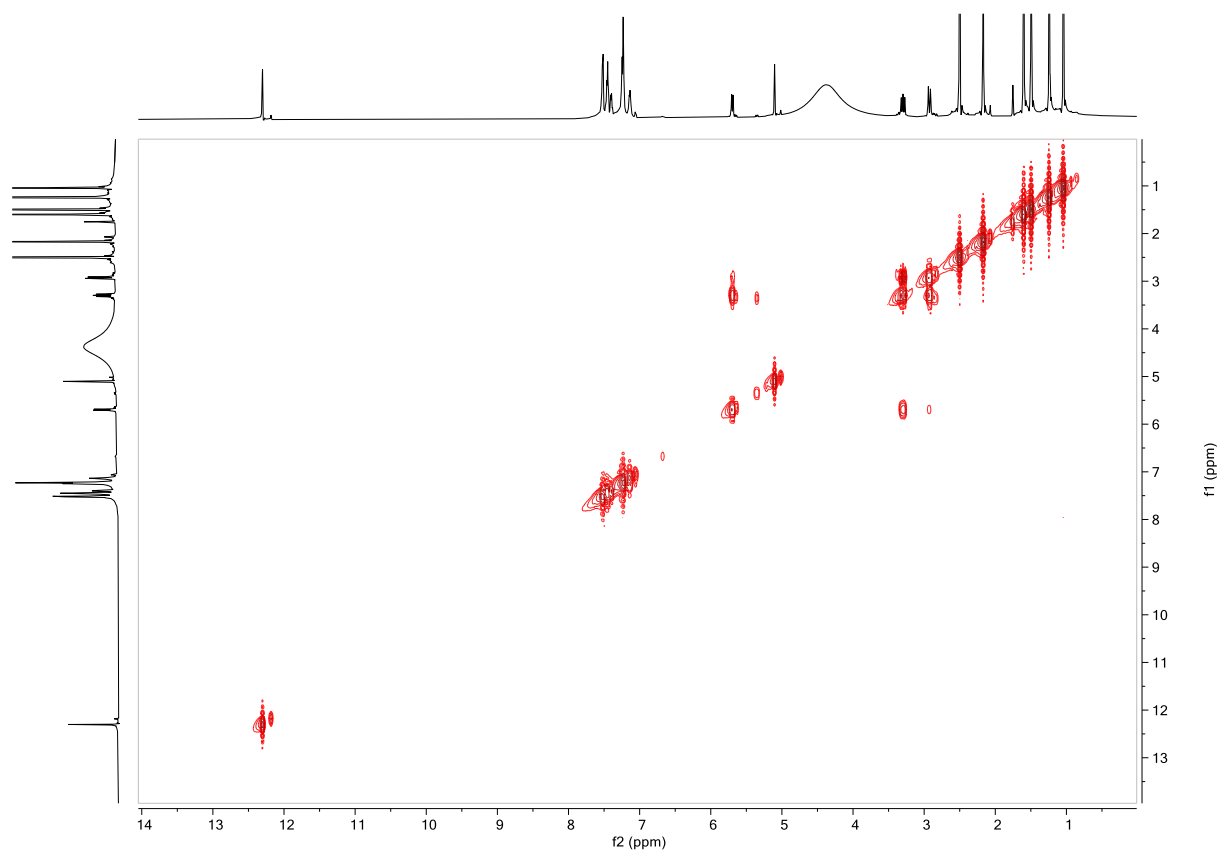

**Figure S16.** HMBC Spectrum of **2** in DMSO-*d*<sub>6</sub>

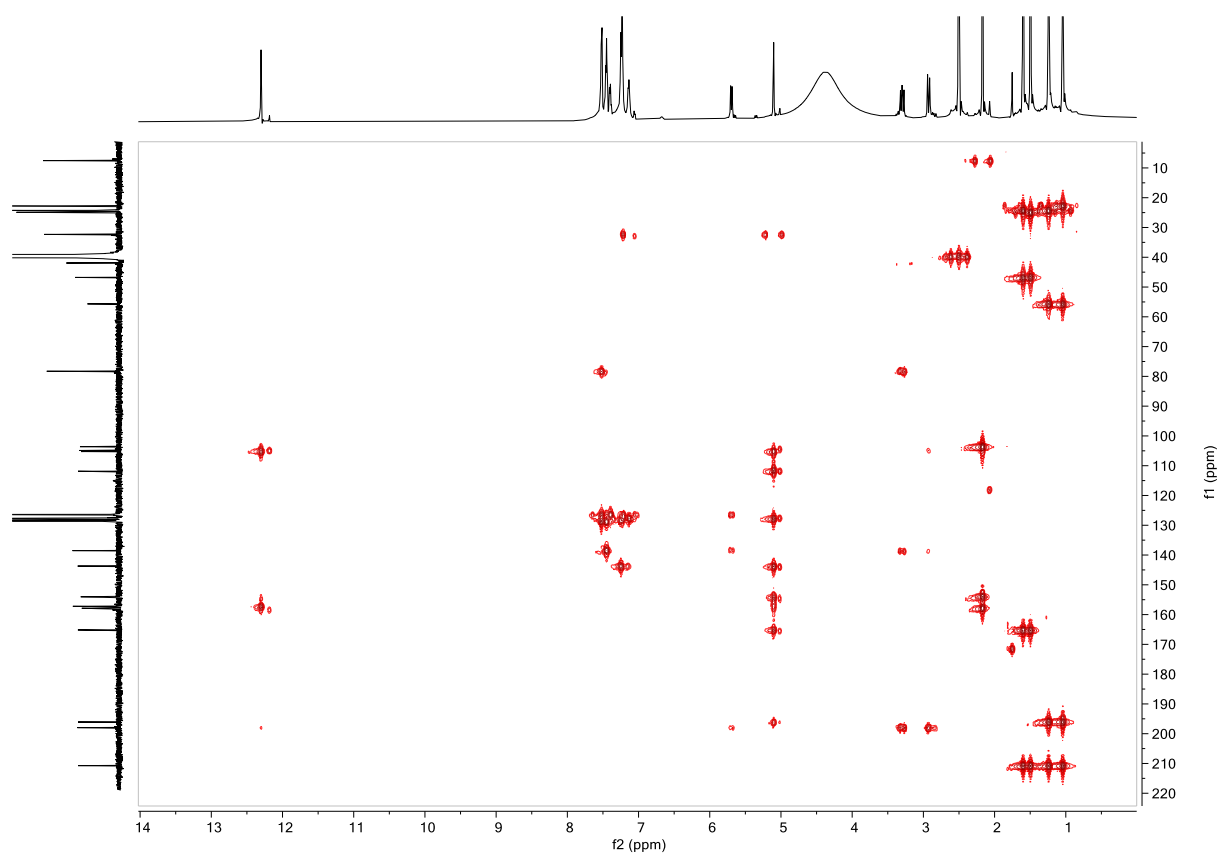

**Figure S17.** 1D ROESY Spectrum of **2** in DMSO-*d*<sub>6</sub> (irradiated at 5.70 ppm)

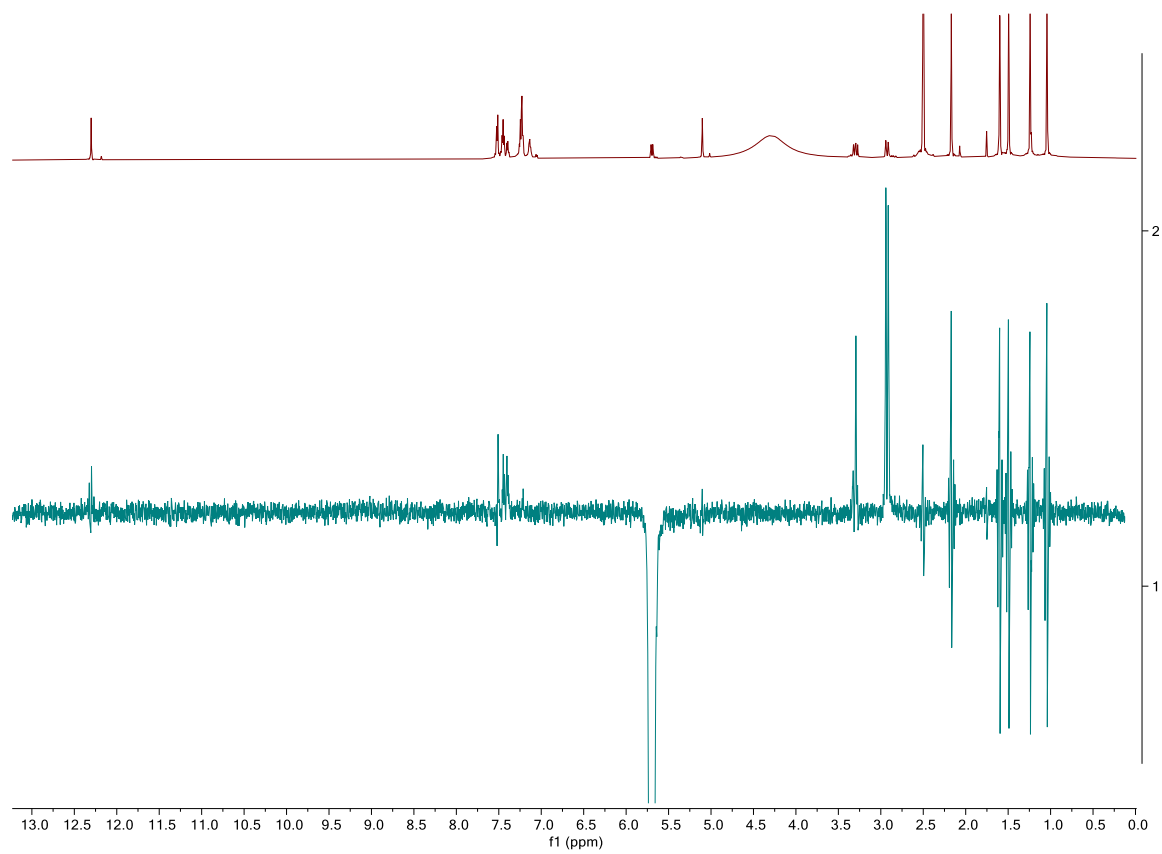

**Figure S18.** 1D ROESY Spectrum of **2** in DMSO-*d*<sub>6</sub> (irradiated at 5.10 ppm)

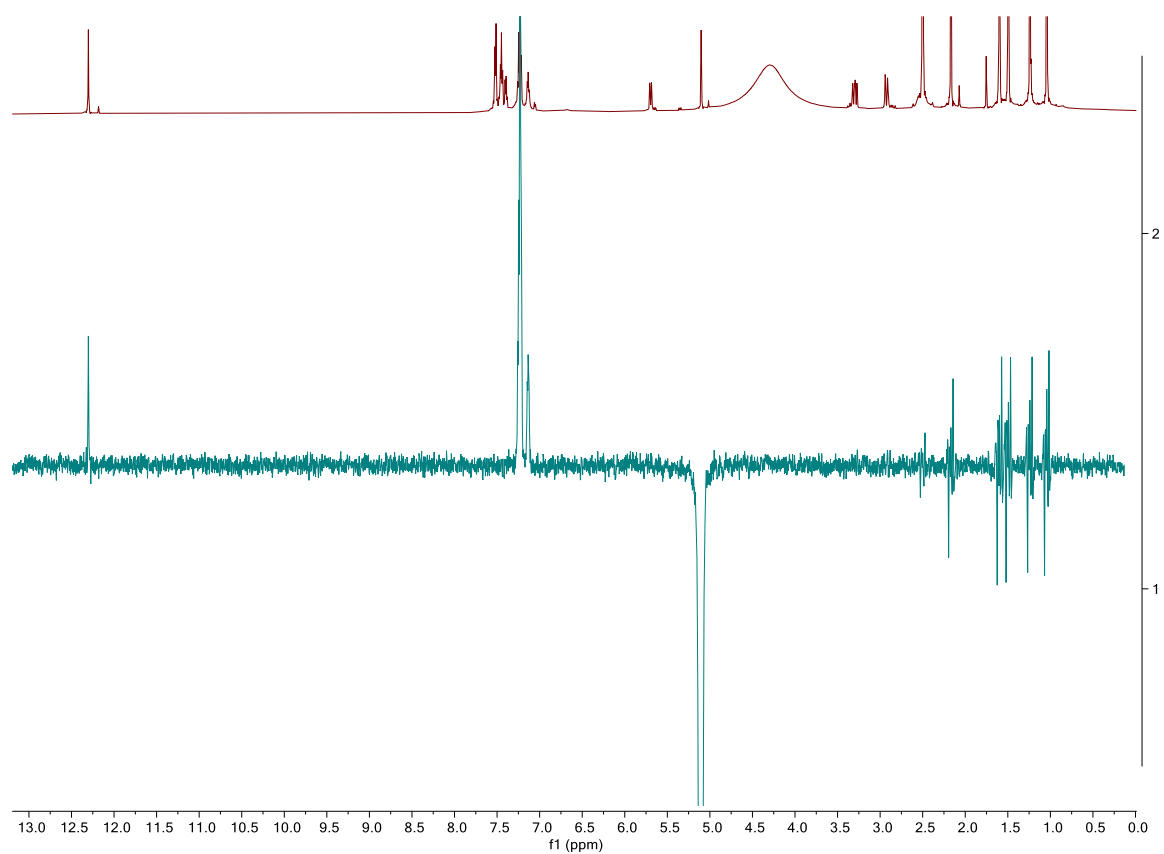

**Figure S19.** 1D ROESY Spectrum of **2** in DMSO-*d*<sub>6</sub> (irradiated at 2.17 ppm)

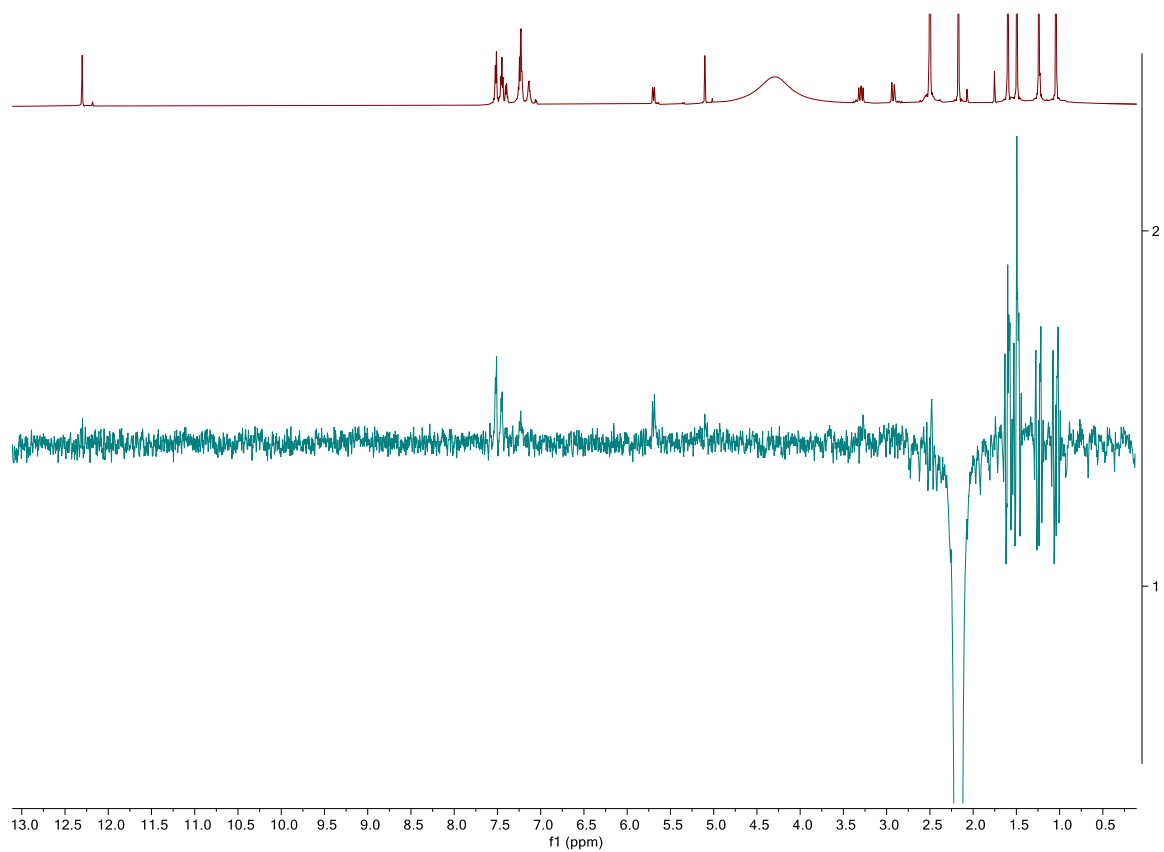



**Figure S20.**  $^1\text{H}$  Spectrum of **2** in  $\text{CDCl}_3$

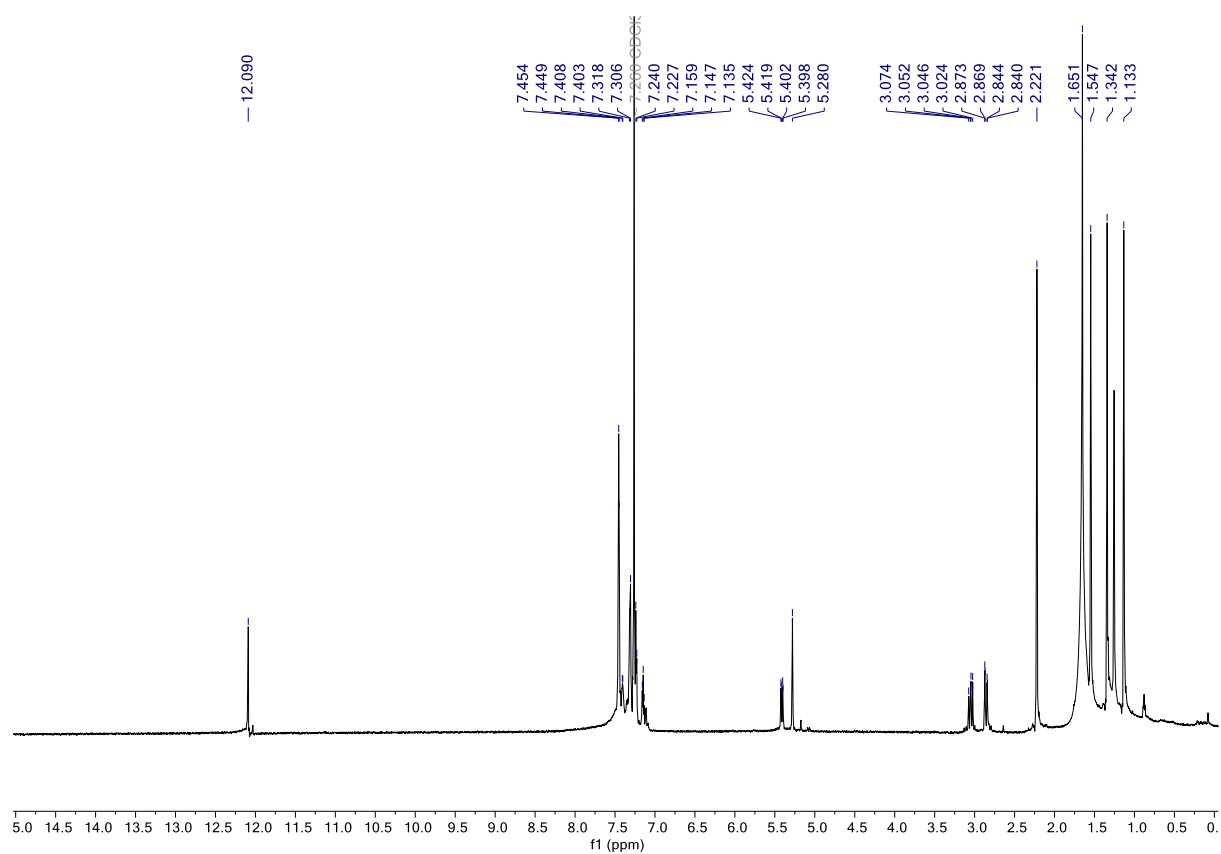

**Figure S21.** Cell viability assessed using the MTT assay after 24 h incubation of NFFs with 0.75-25  $\mu$ M of **2** (A, n=8). NFF proliferation during 72 h treatment with **2** (B; **2**, n=2; DMSO, n=3). Data are mean $\pm$ SEM.

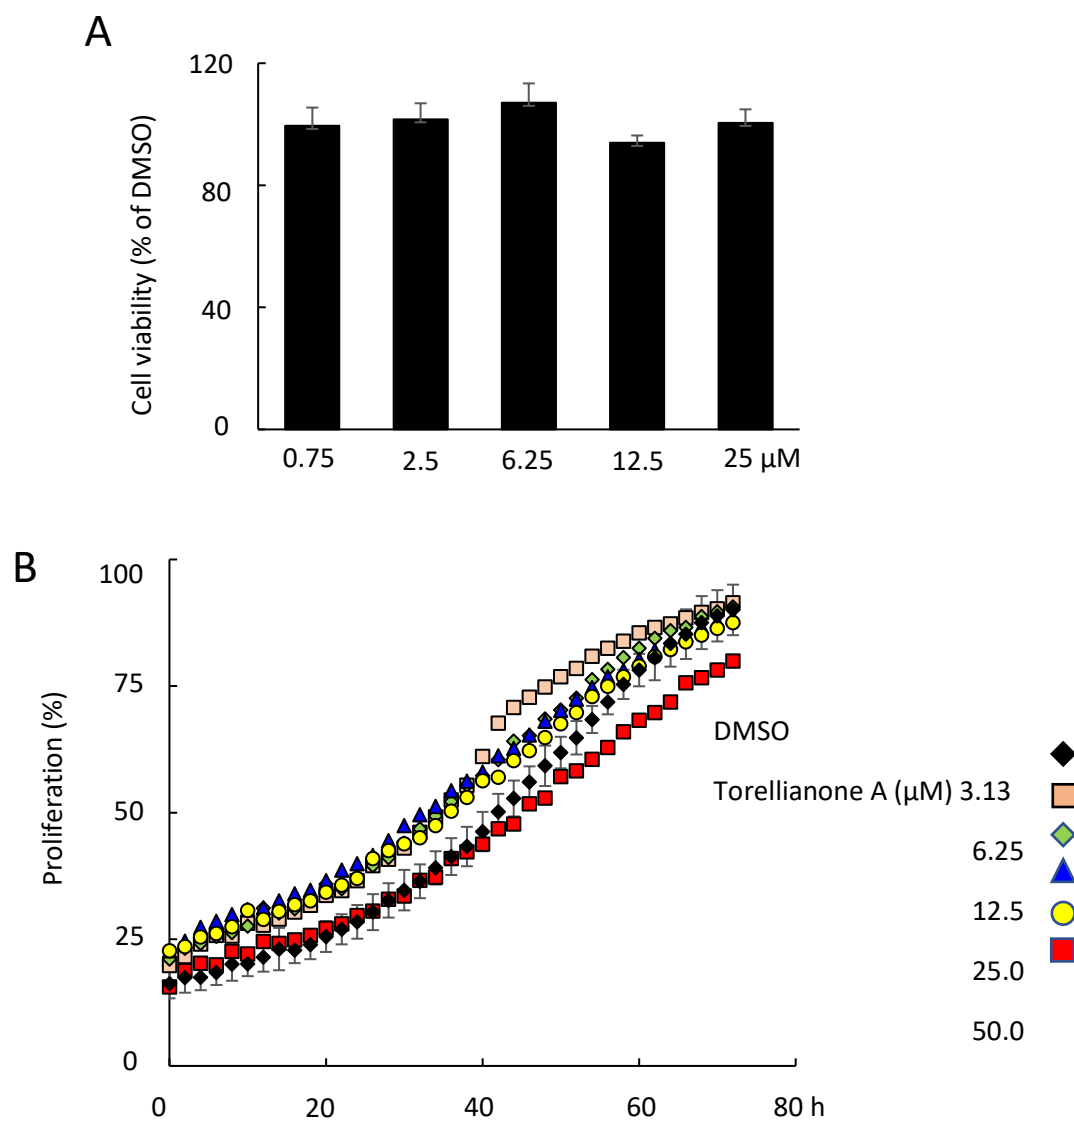

**Figure S22.** Effects of **2** (n=2) or DMSO (n=3) on wound repopulation by NFFs incubated for 72 h (n=2). Data was analysed for wound width (A) and rate of cell migration into the wound region (B).

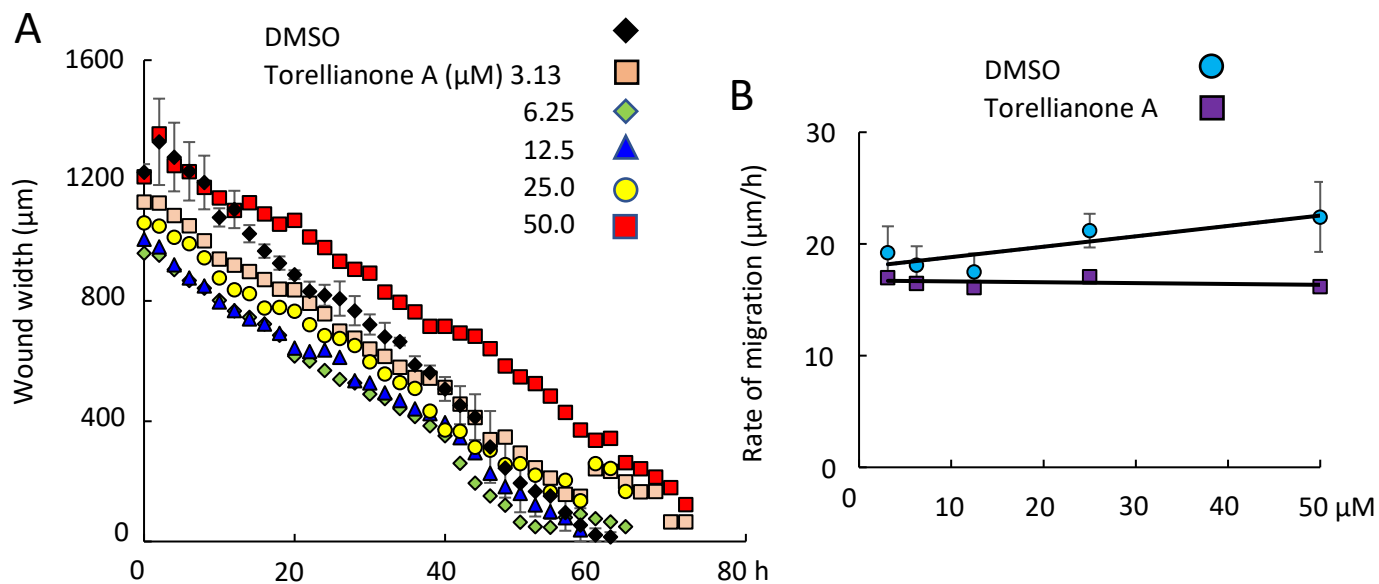

Supplement: s1 [file s1]
